# Supplementary material for: The posterior hippocampus becomes topographically and functionally specialized with development
Source: Research Square preprint supplement (doi:10.21203/rs.3.rs-7206483/v1), 2025-07-25
Supplement: Supplementary file 1 [file 524812af974f087d087a921c.docx]

**Supplementary Material**

**
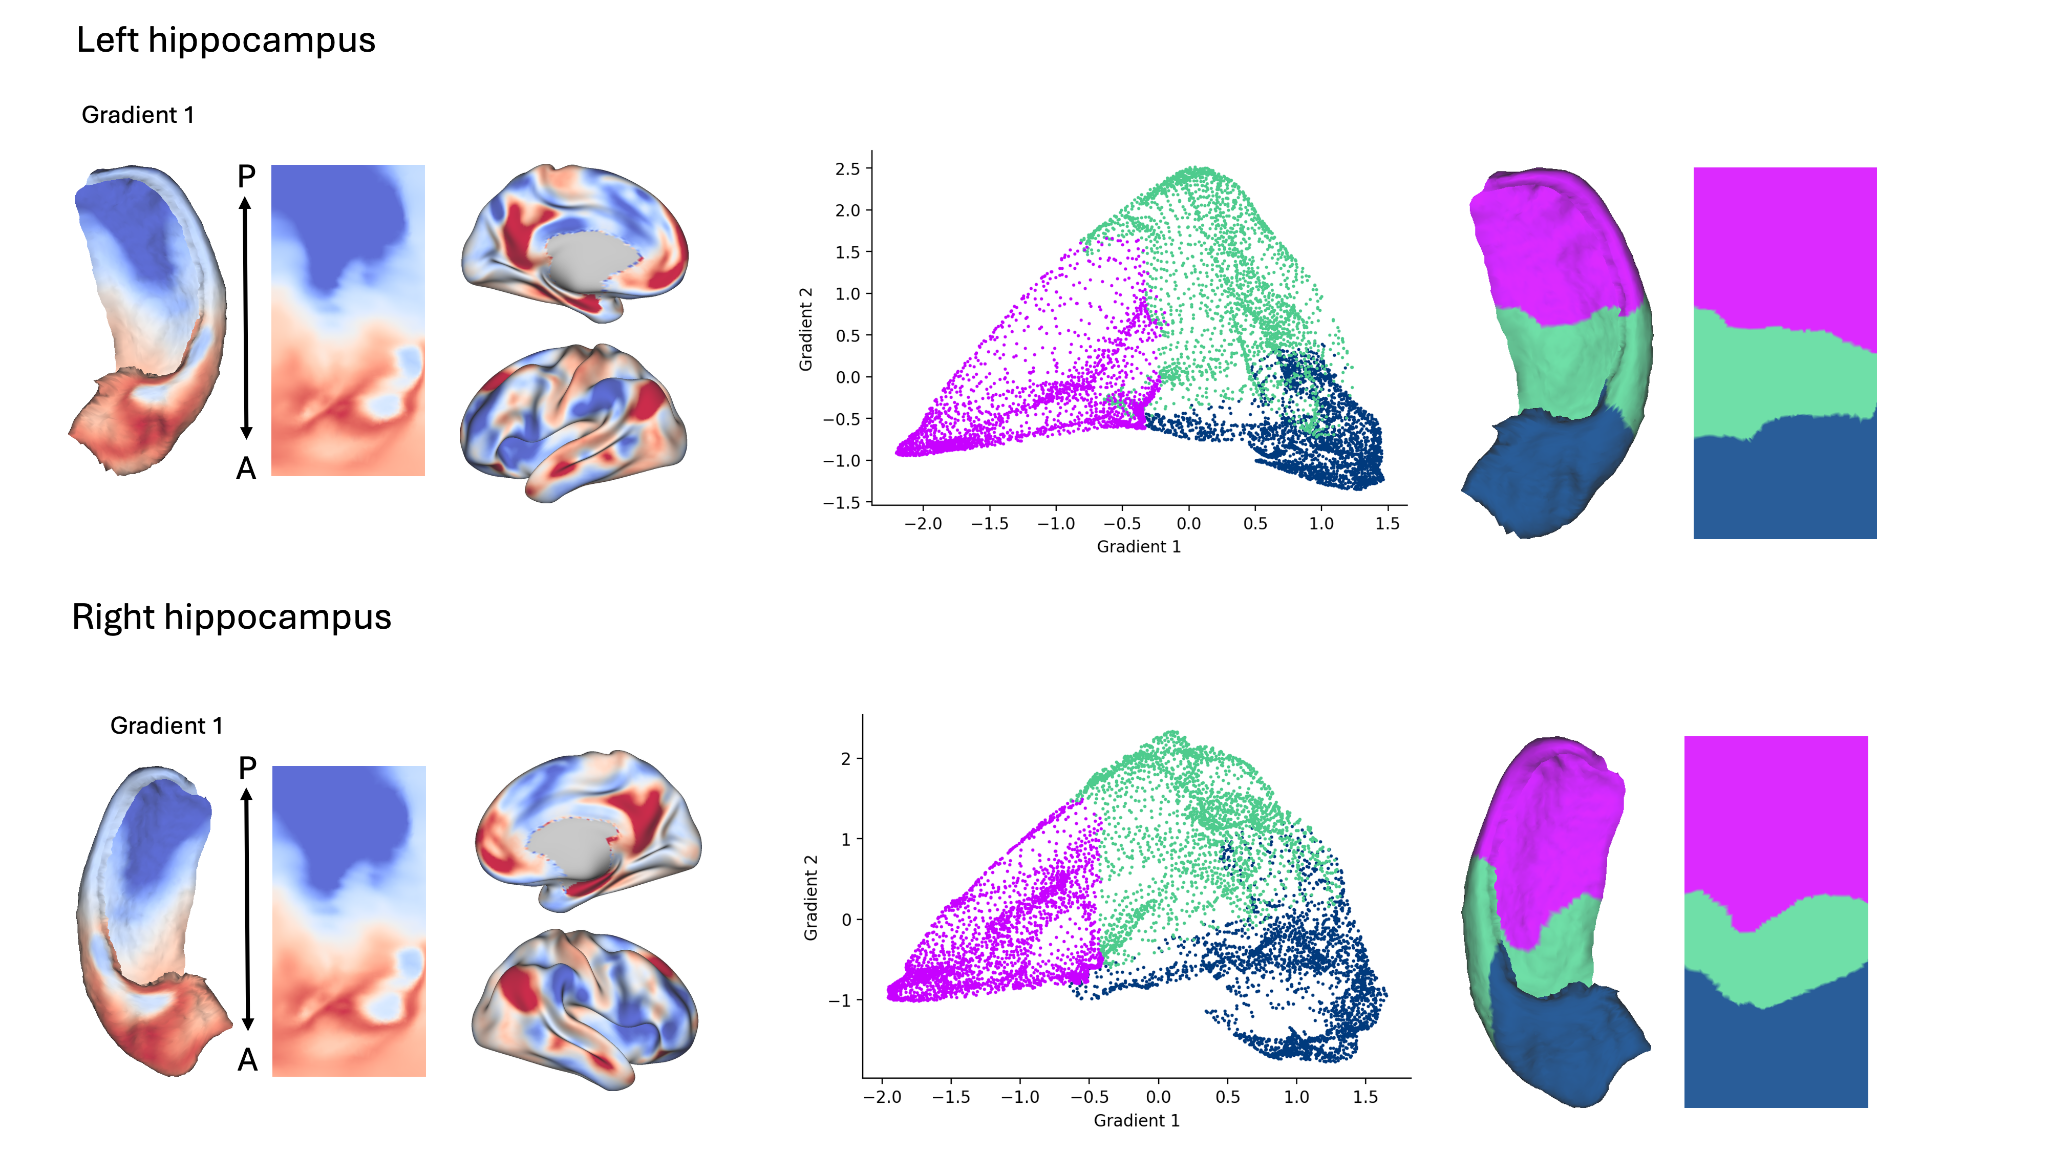
**

**Fig 1** Comparison of right and left hippocampal gradients and systems.

**
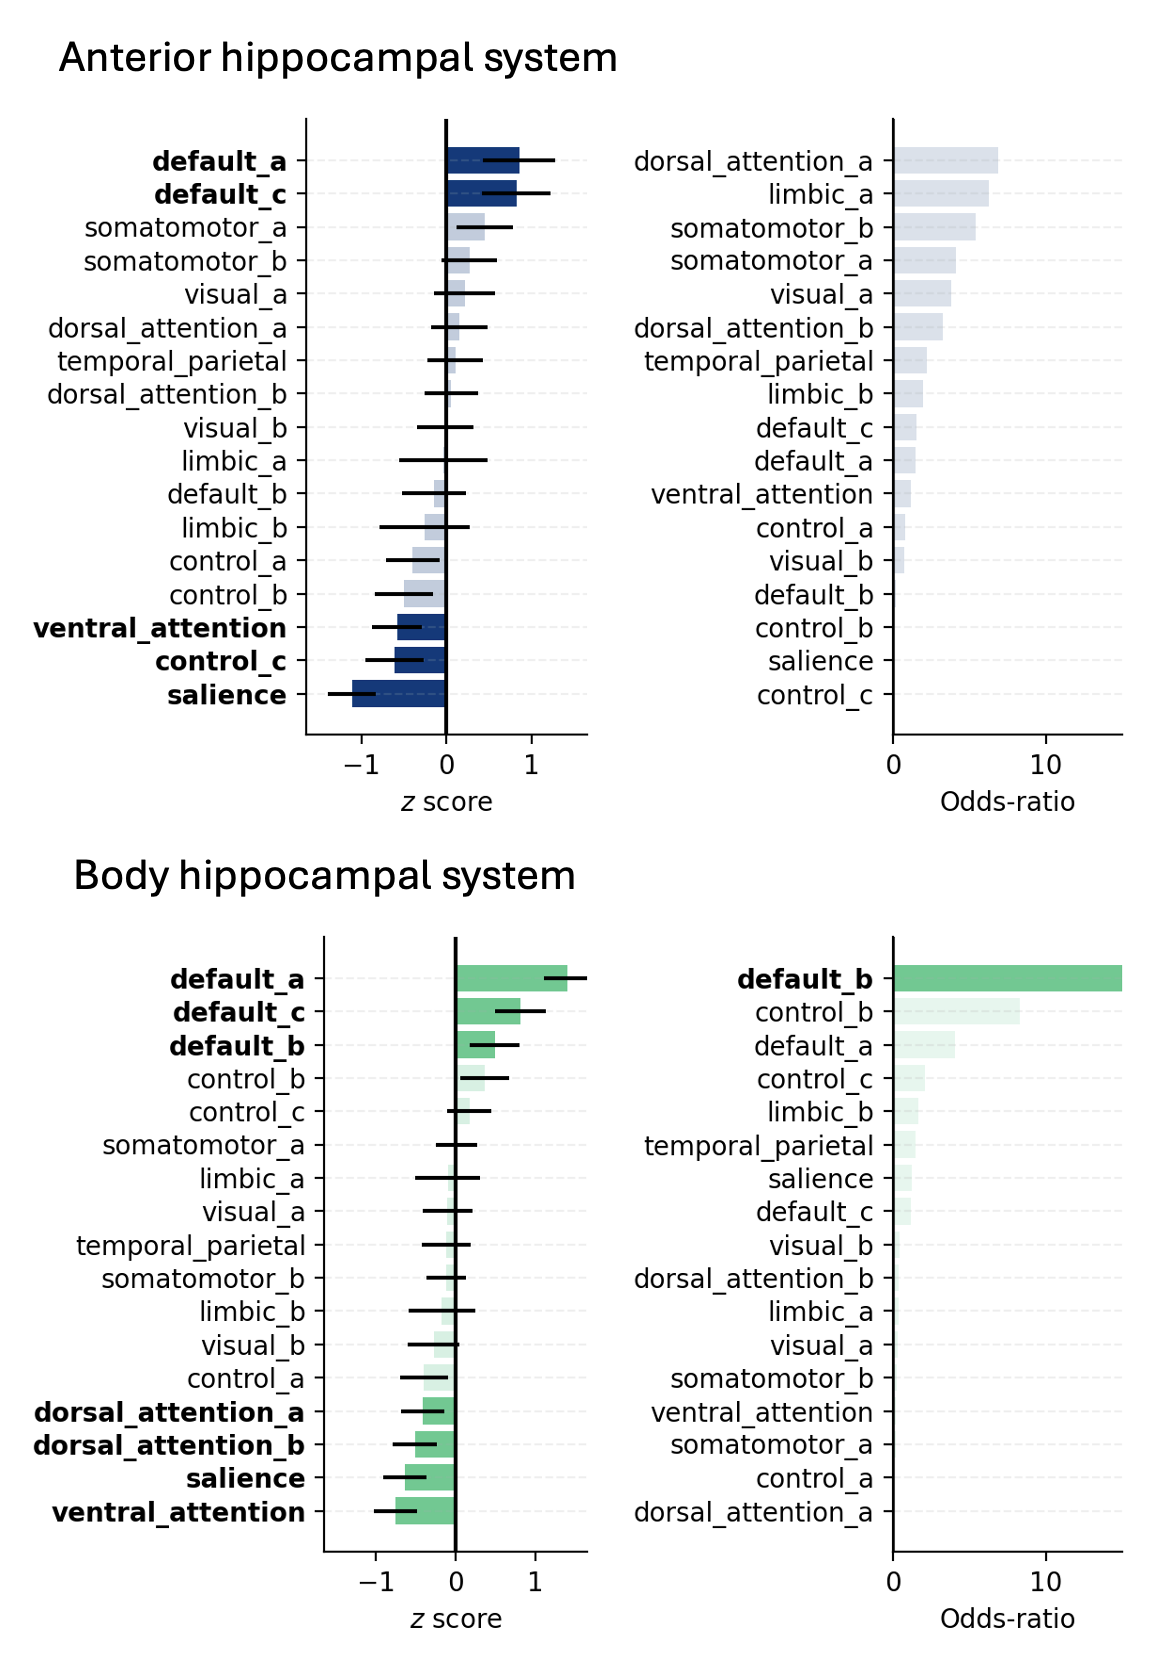
**

**Fig 2** Mean neocortical-connectivity (±SD) across subjects for each hippocampal system, along with odds-ratios from the one-versus-rest logistic regression models trained to classify each hippocampal system from all others.


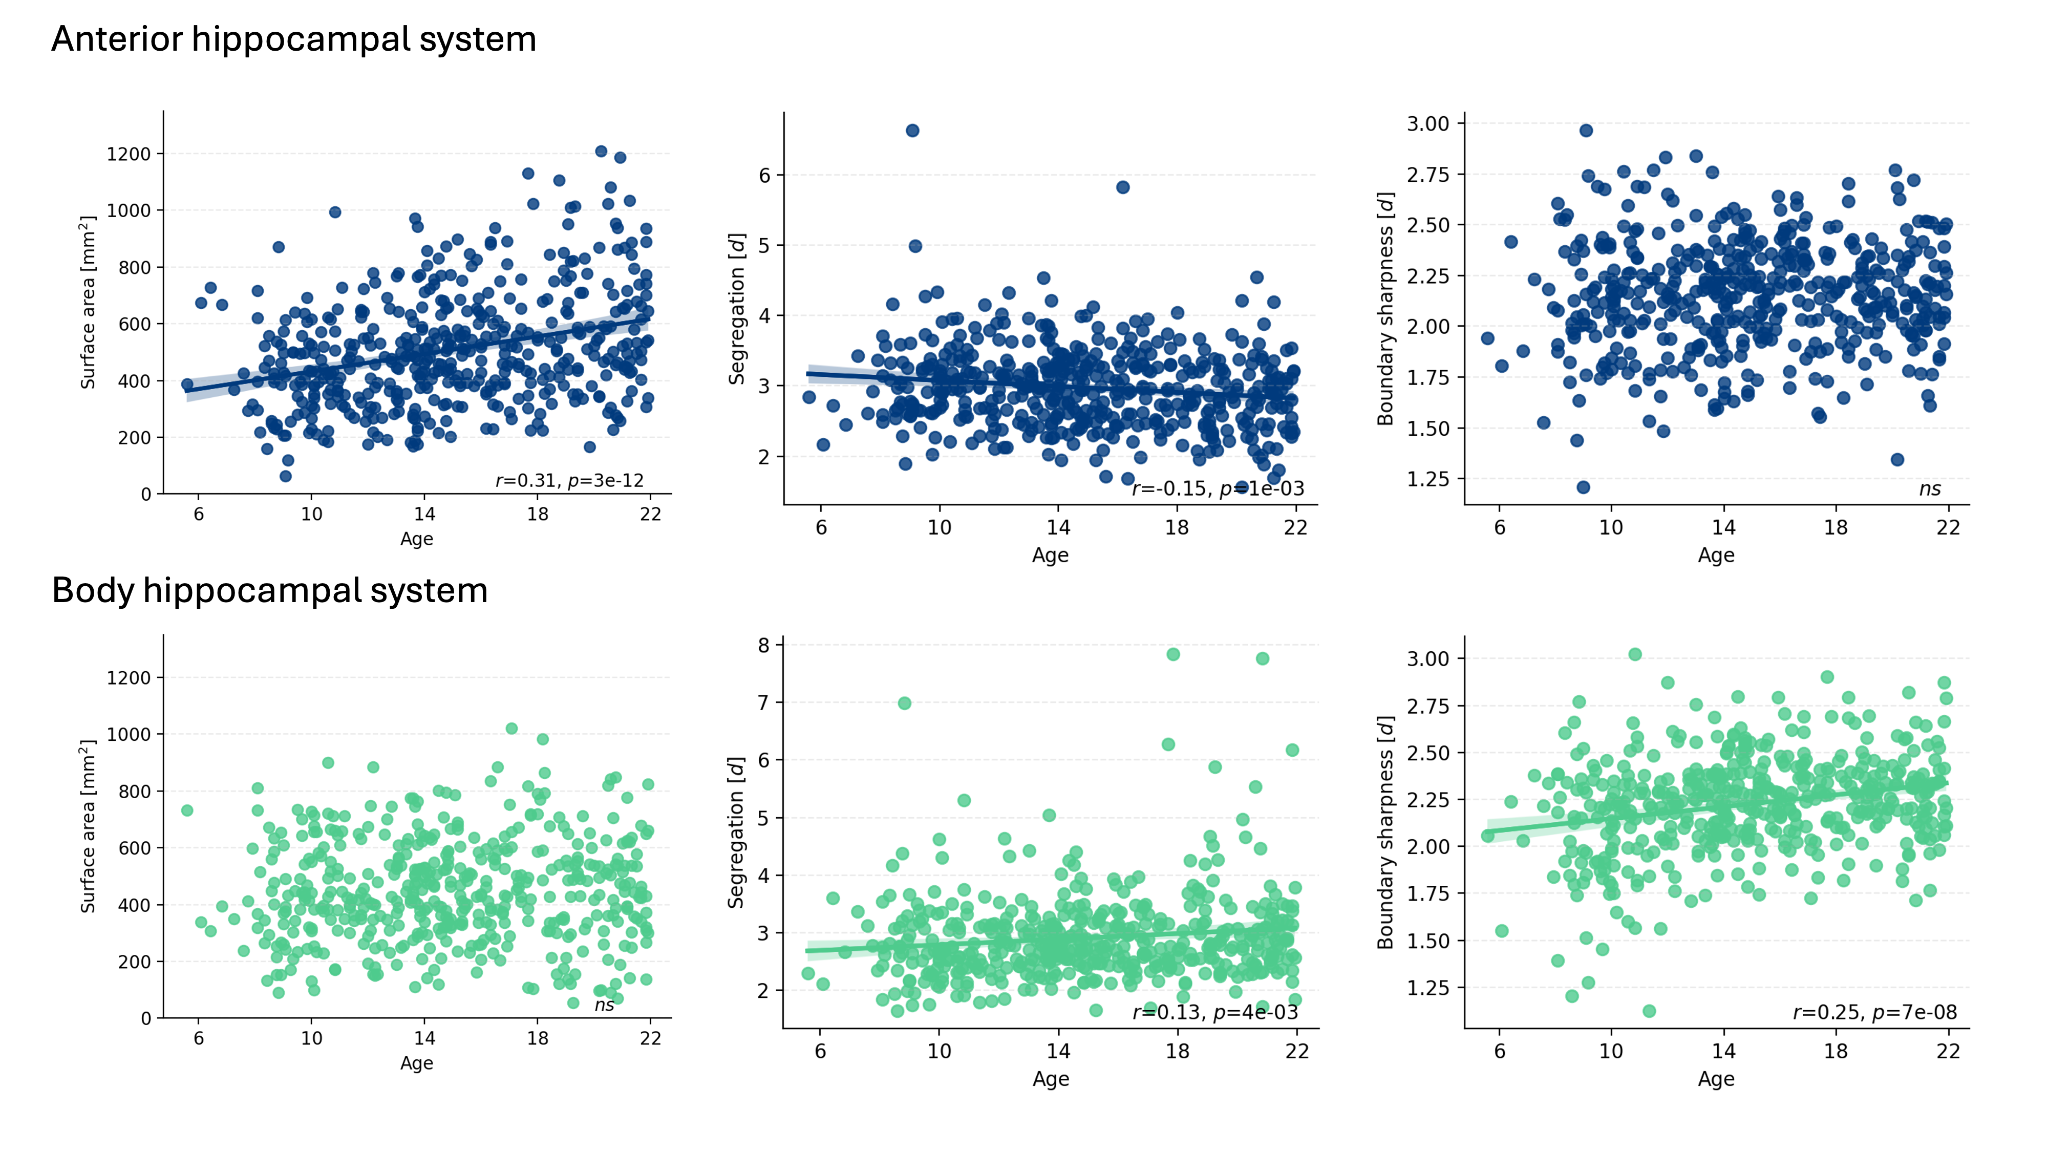


**Fig 3** Correlations between age and: surface-area, segregation, and boundary-sharpness for the anterior and body hippocampal systems.

**
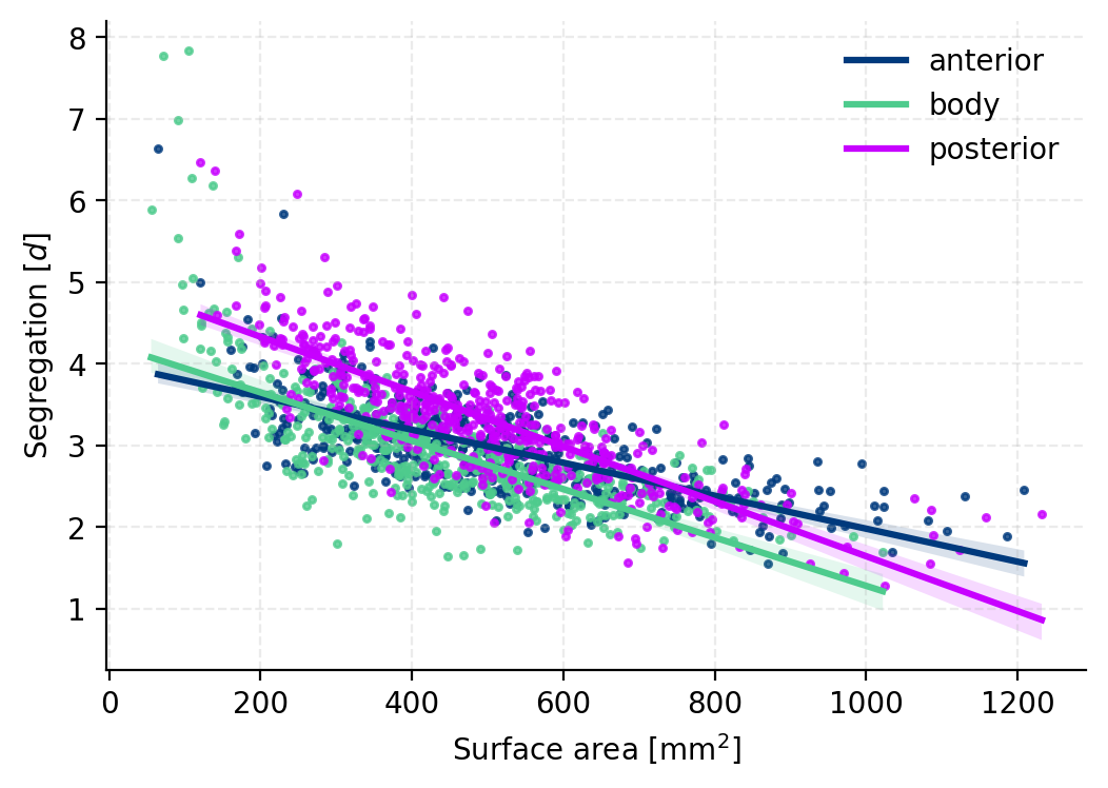
**

**Fig 4** Scatterplot illustrating the correlation between segregation and surface-area. Larger networks show lower segregation.


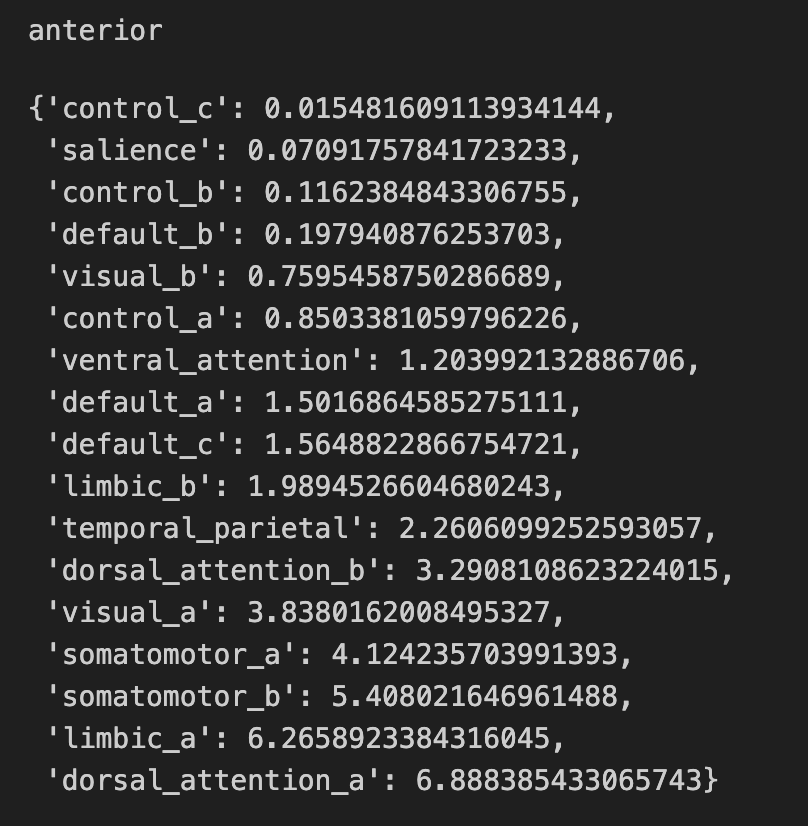

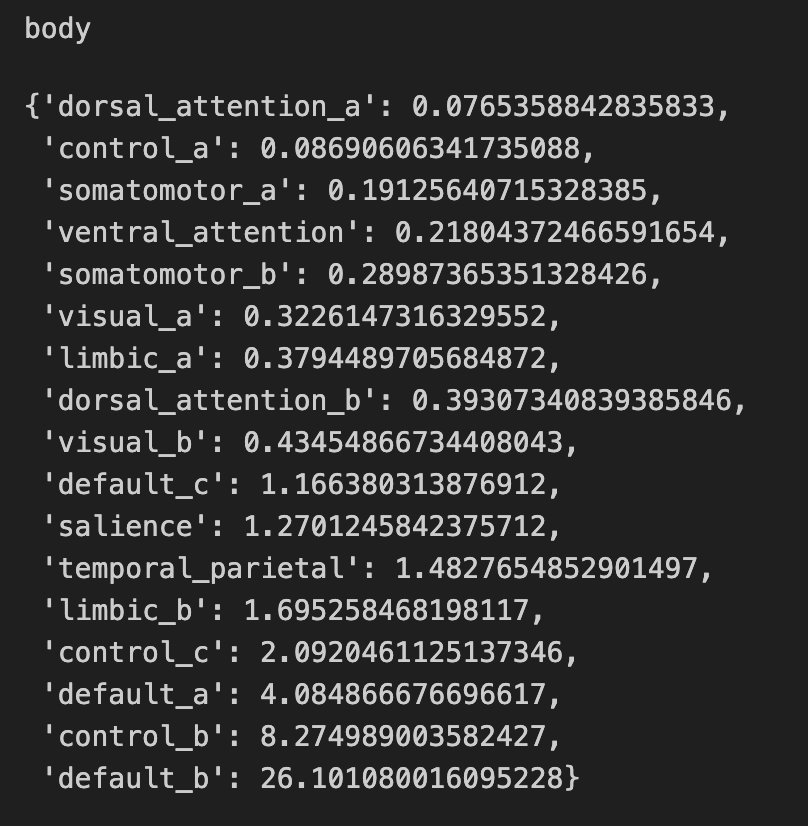

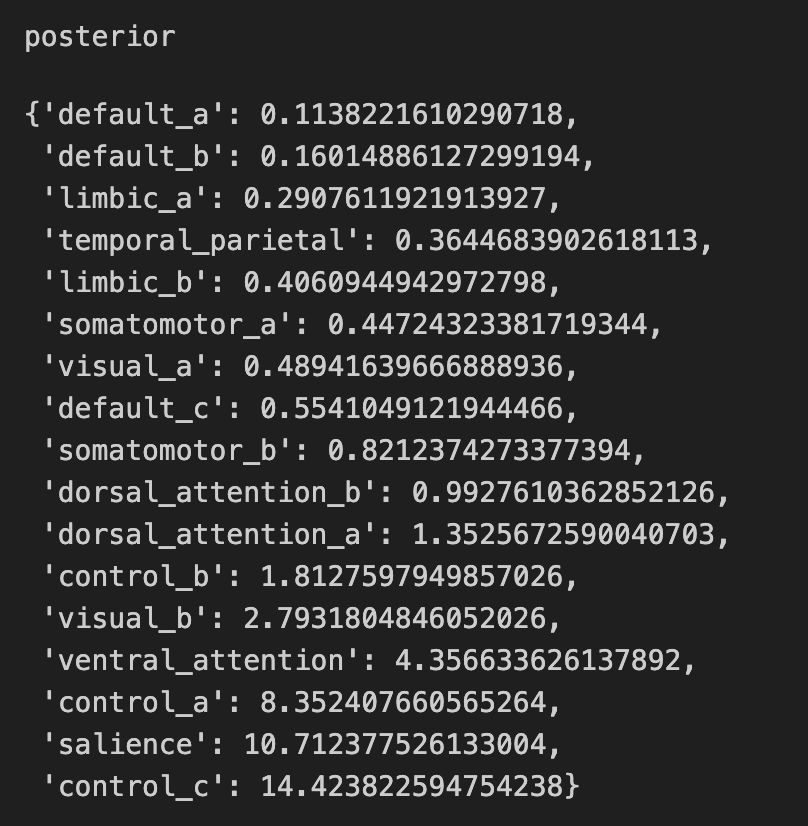


**Fig 5** Exact odds-ratios from the one-versus-rest logistic regression models trained to classify each hippocampal system from all others.


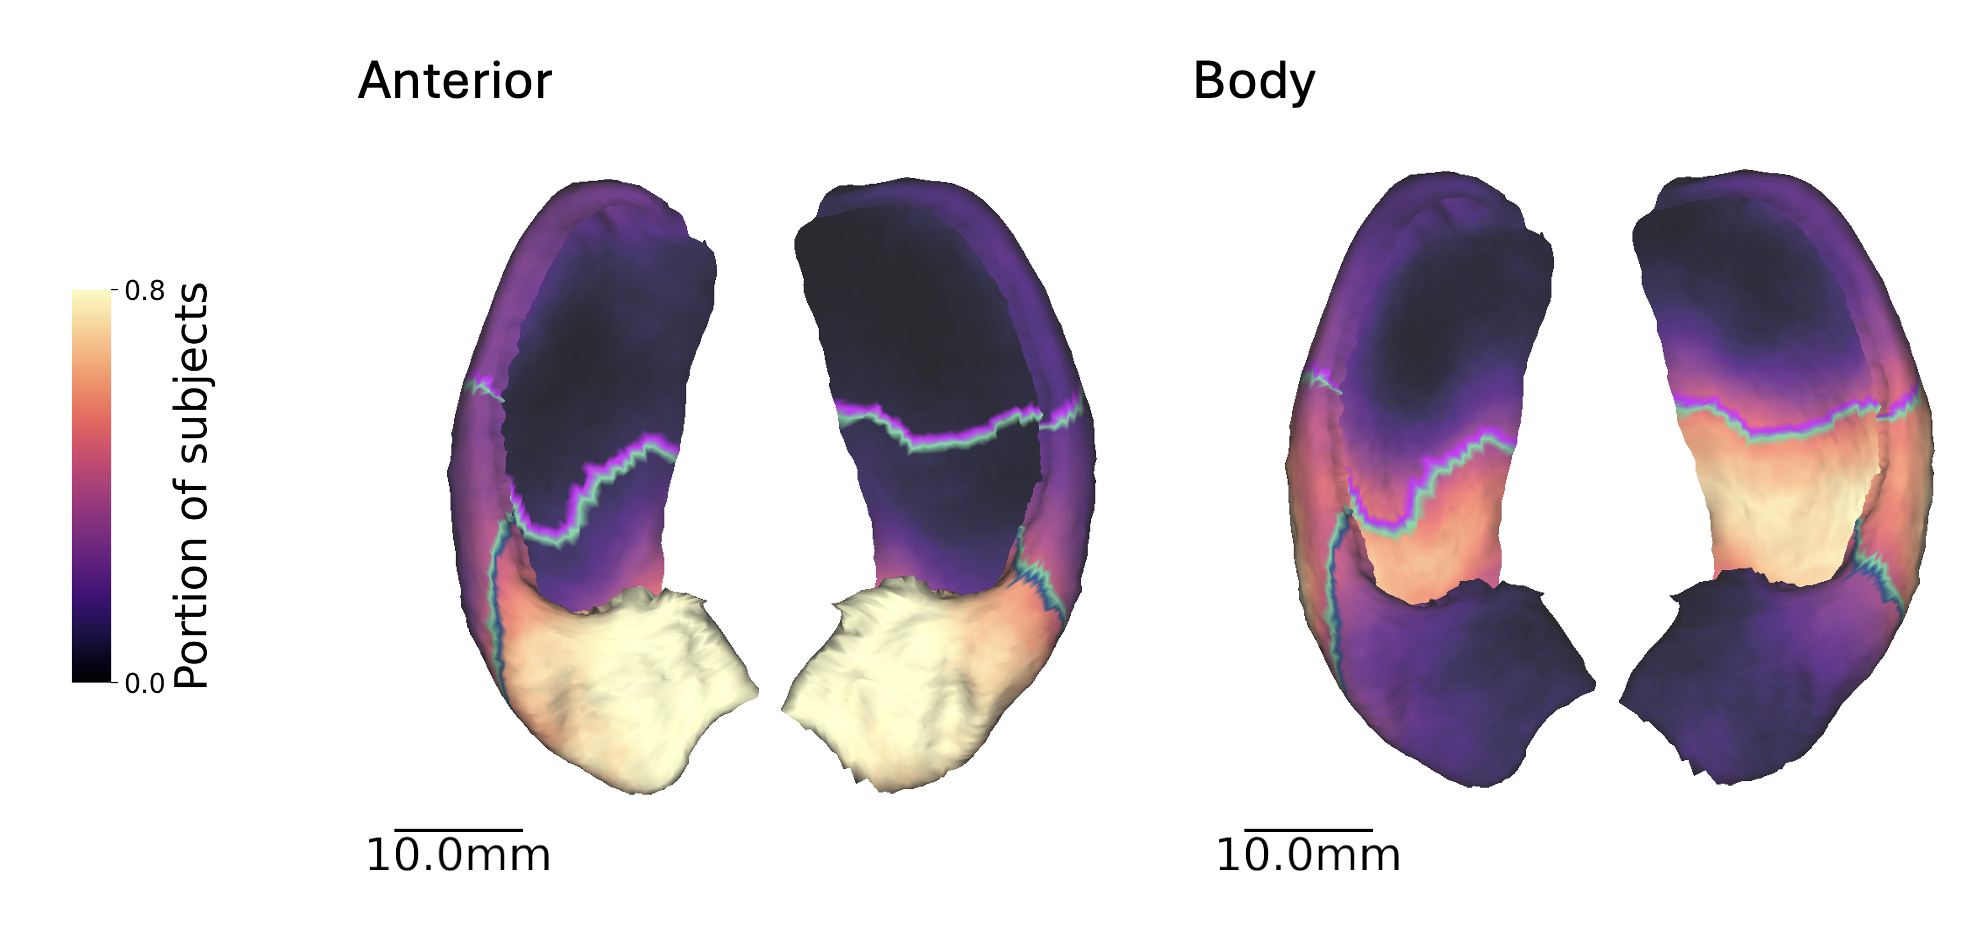


**Fig 6** Portion of subjects in which each vertex on the hippocampal surface was assigned to the anterior system (left) and body system (right) following precision mapping, overlaid as a heatmap on the right and left template hippocampi. Each hippocampal system (posterior, body. anterior) is shown as an outline on the group-average heatmap.
